# Supplementary material for: Rapid evaporation-induced self-assembly of three-dimensional photonic crystals using Fe3O4@C magnetic nanocomposites
Source: Royal Society of Chemistry journal article supplement (doi:10.1039/c7nj00022g), 2017-01-01
Supplement: c7nj00022g1.pdf [file c7nj00022g1.pdf]

## Electronic Supplementary Information

### Rapid Evaporation-Induced Self-assembly of Three-Dimensional Photonic Crystals Using Fe<sub>3</sub>O<sub>4</sub>@C Magnetic Nanocomposites

Meng Li,<sup>a</sup> Yuhua Cao,<sup>\*ab</sup> Xinjiong Ni<sup>a</sup> and Guangqun Cao<sup>a</sup>

<sup>a</sup>School of Chemical and Material Engineering, Jiangnan University, Wuxi, 214122, P. R. China

<sup>b</sup>The Key Laboratory of Food Colloids and Biotechnology, Ministry of Education, Wuxi, 214122, P. R. China

#### Contents

Table S1 Average hydrodynamic diameters and polydispersity index (PDI) of Fe<sub>3</sub>O<sub>4</sub>@C MNCPs synthesized under different solvothermal reaction temperature.

Fig. S1 Hydrodynamic diameter distribution histograms of Fe<sub>3</sub>O<sub>4</sub>@C MNCPs synthesized under different solvothermal reaction temperature (S1 (a), S2 (b), and S3 (c))

Fig. S2 Digital photos of the dispersions containing the MNCPs with different particle size without under an external magnetic field (S1 (a), S2 (b), and S3 (c))

Table S1

| Sample | Average hydrodynamic diameter/nm | RSD (n=5)/% | PDI   |
|--------|----------------------------------|-------------|-------|
| S1     | 219.2                            | 6.95        | 0.055 |
| S2     | 254.4                            | 5.52        | 0.053 |
| S3     | 287.4                            | 3.97        | 0.029 |

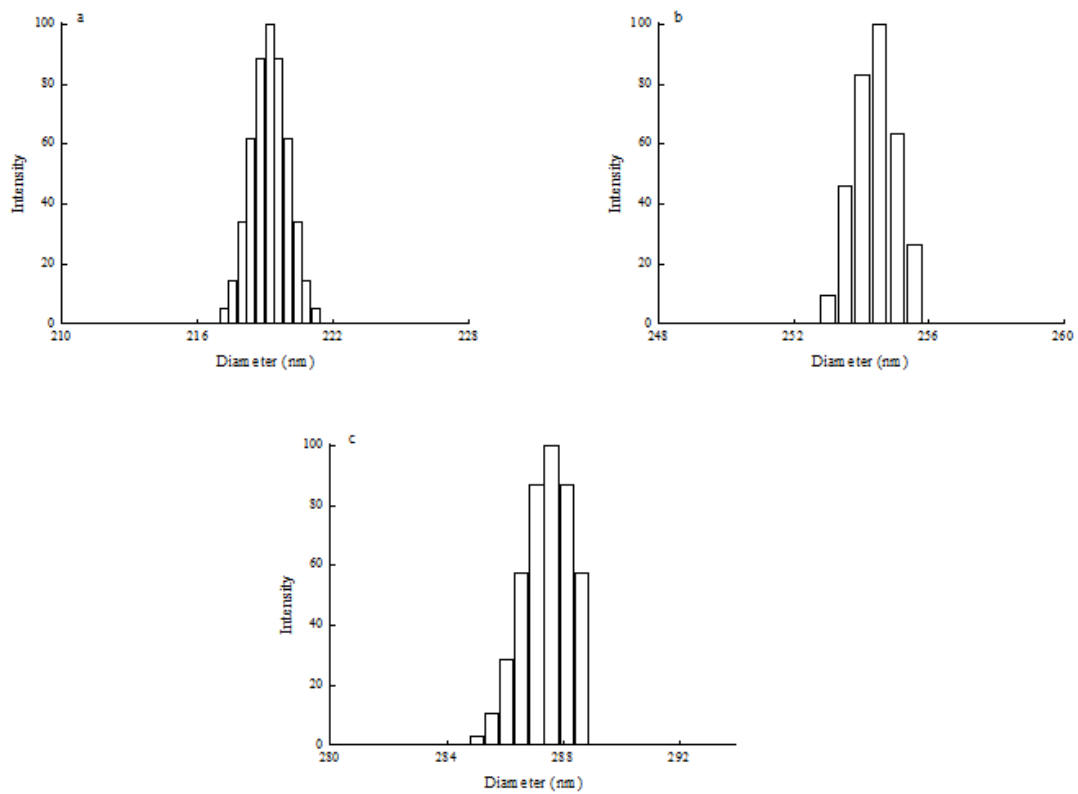

Fig. S1

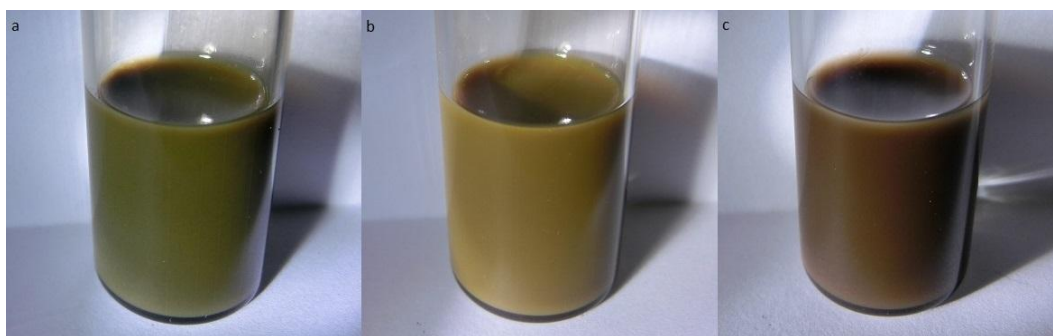

Fig. S2
